# Supplementary material
Source: publisher figshare collection journal article supplement (https://tandf.figshare.com/ndownloader/files/13525247)
Supplement: Supplementary file 1 [file 13525247]

**SUPPLEMENTARY MATERIAL**

**Sequential injection-chemiluminescence evaluation of stigmasterol glucoside and luteolin via green synthesis of silver nanoparticles using biomass of *Plectranthus asirensis***

Musarat Amina*a, Nawal A. Alarfajb, Maha F. El-Tohamyb*, Nawal M. Al Musayeiba, Hesham F. Orabyc

*aDepartment of Pharmacognosy, Pharmacy College, King Saud University, Riyadh11451, Kingdom of Saudi Arabia*

*bDepartment of Chemistry, College of Science, King Saud University, P.O. Box 22452, Riyadh 11495, Saudi Arabia*

*cDepartment of Crop Science, Faculty of Agriculture, Zagazig University, Zagazig, Egypt*

***Corresponding author:** Maha El-Tohamy [star2000star@gmail.com](mailto:star2000star@gmail.com) and Musarat Amina [musarat.org@gmail.com](mailto:musarat.org@gmail.com)

**List of supplementary materials**

|  | **Page** |
| --- | --- |
| **Figure S1.** 1H NMR spectrum of compound **1** (700 MHz, DMSO). | **3** |
| **Figure S2.** 1H NMR expansion spectrum of compound **1** (700 MHz, DMSO). | **3** |
| **Figure S3.** 1H NMR expansion spectrum of compound **1** (700 MHz, DMSO). | **4** |
| **Figure S4.** 13C NMR spectrum of compound **1** (175 MHz, DMSO). | **4** |
| **Figure S5.** 13C NMR expansion spectrum of compound **1** (175 MHz, DMSO). | **5** |
| **Figure S6.** 1H NMR spectrum of compound **2** (700 MHz, DMSO). | **6** |
| **Figure S7.** 1H NMR expansion spectrum of compound **2** (700 MHz, DMSO). | **6** |
| **Figure S8.** 13C NMR spectrum of compound **2** (175 MHz, DMSO). | **7** |
| **Figure S9.** 13C NMR expansion spectrum of compound **2** (175 MHz, DMSO). | **7** |

**
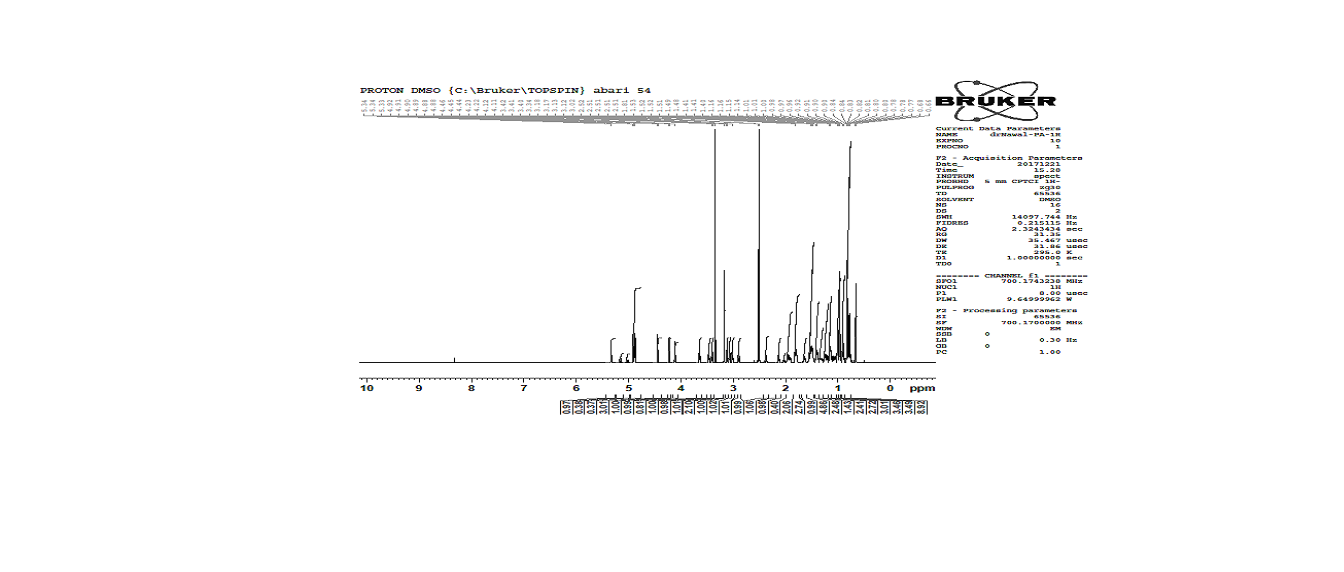
**

**Figure S1:** 1H NMR spectrum of compound **1** (700 MHz, DMSO).


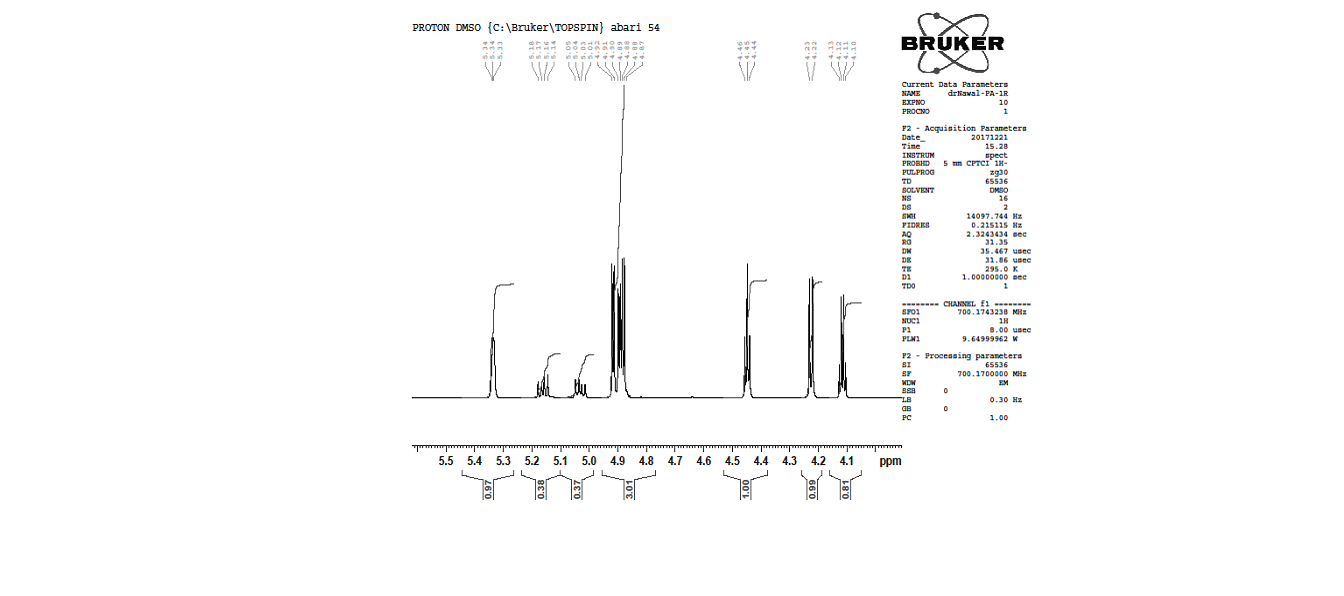


**Figure S2:** 1H NMR expansion spectrum of compound **1** (700 MHz, DMSO).


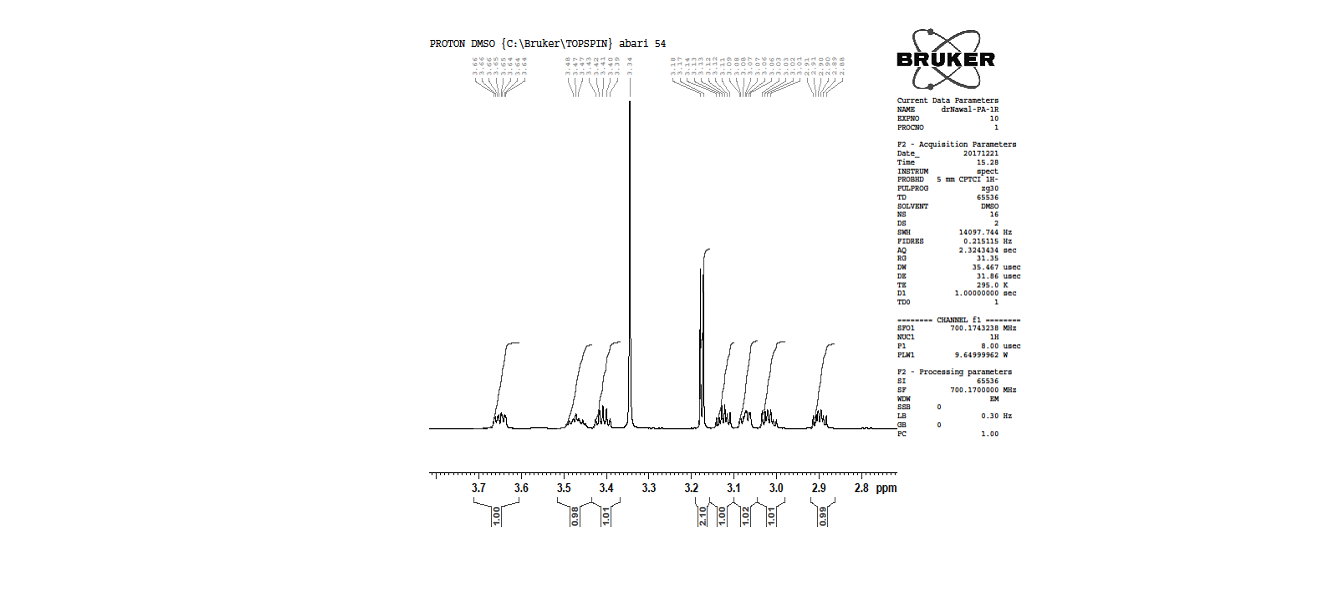


**Figure S3:** 1H NMR expansion spectrum of compound **1** (700 MHz, DMSO).


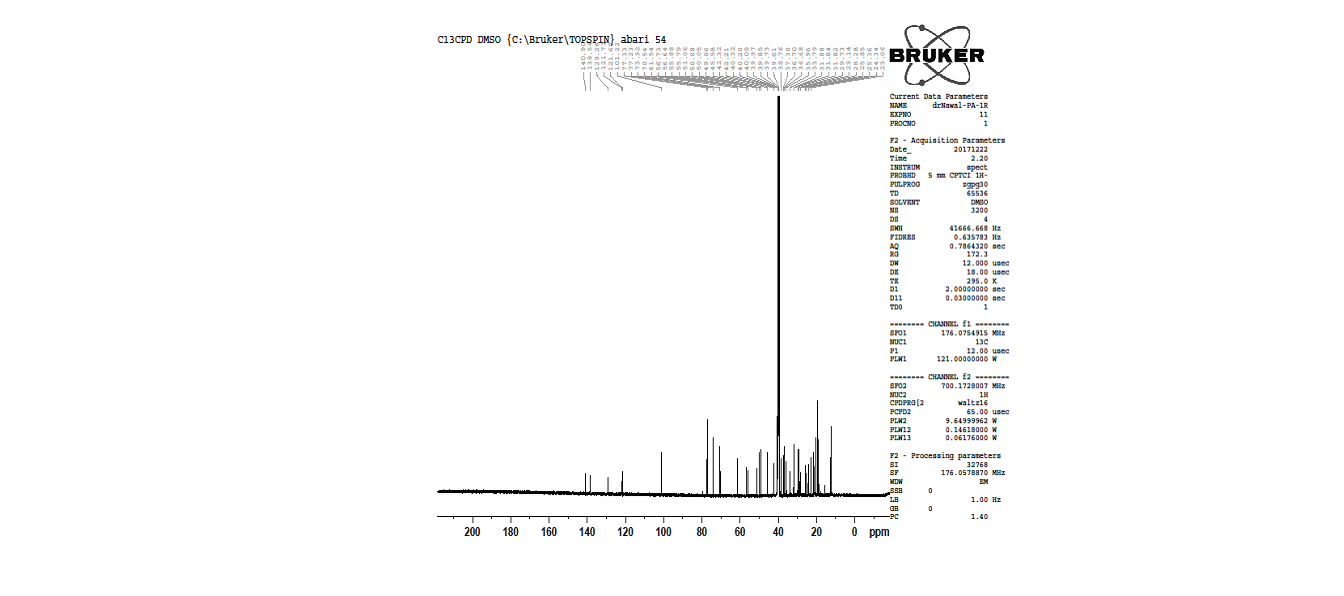


**Figure S4:** 13C NMR spectrum of compound **1** (175 MHz, DMSO).


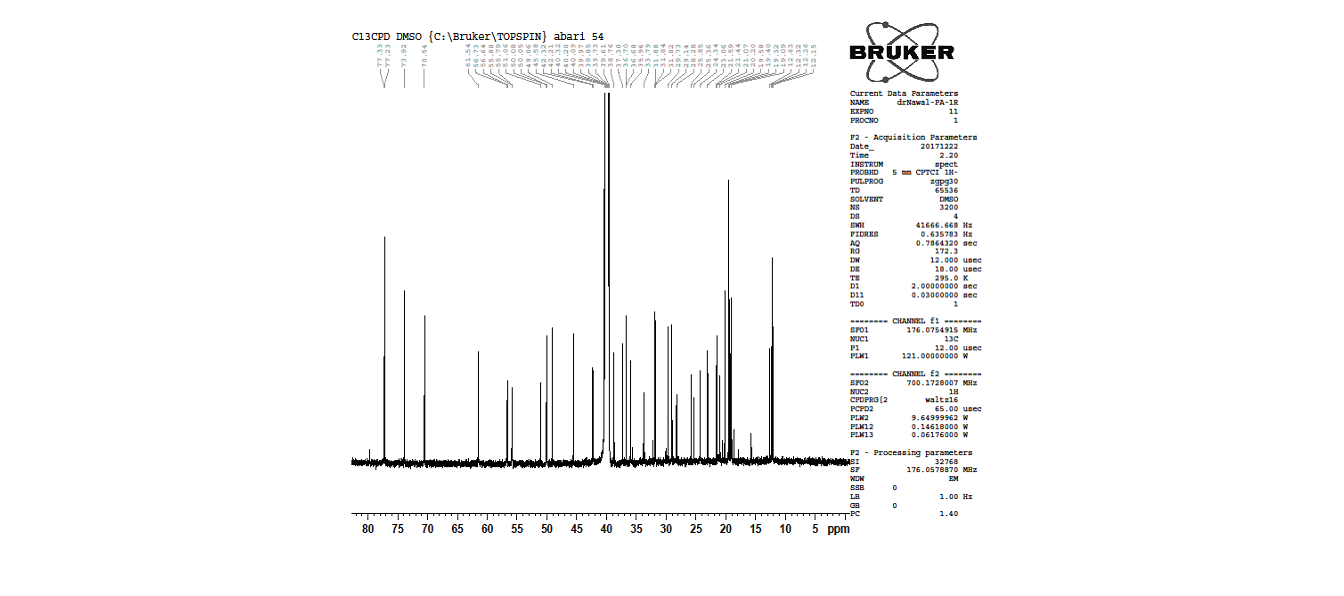


**Figure S5:** 13C NMR expansion spectrum of compound **1** (175 MHz, DMSO).


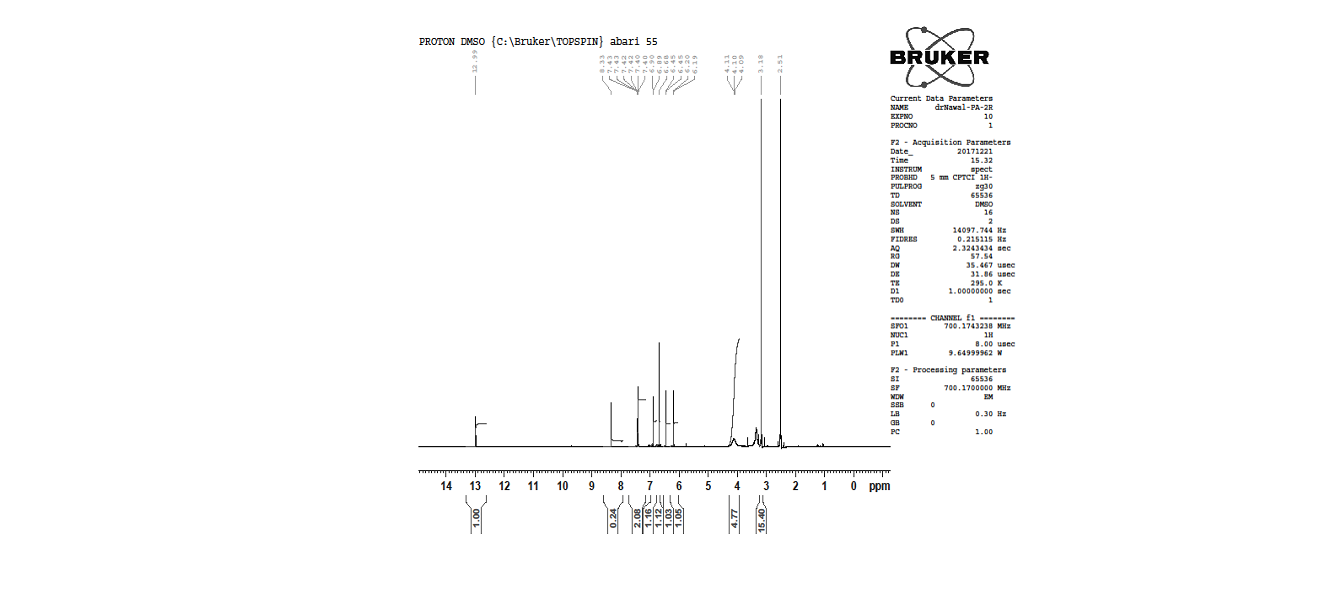


**Figure S6:** 1H NMR spectrum of compound **2** (700 MHz, DMSO).


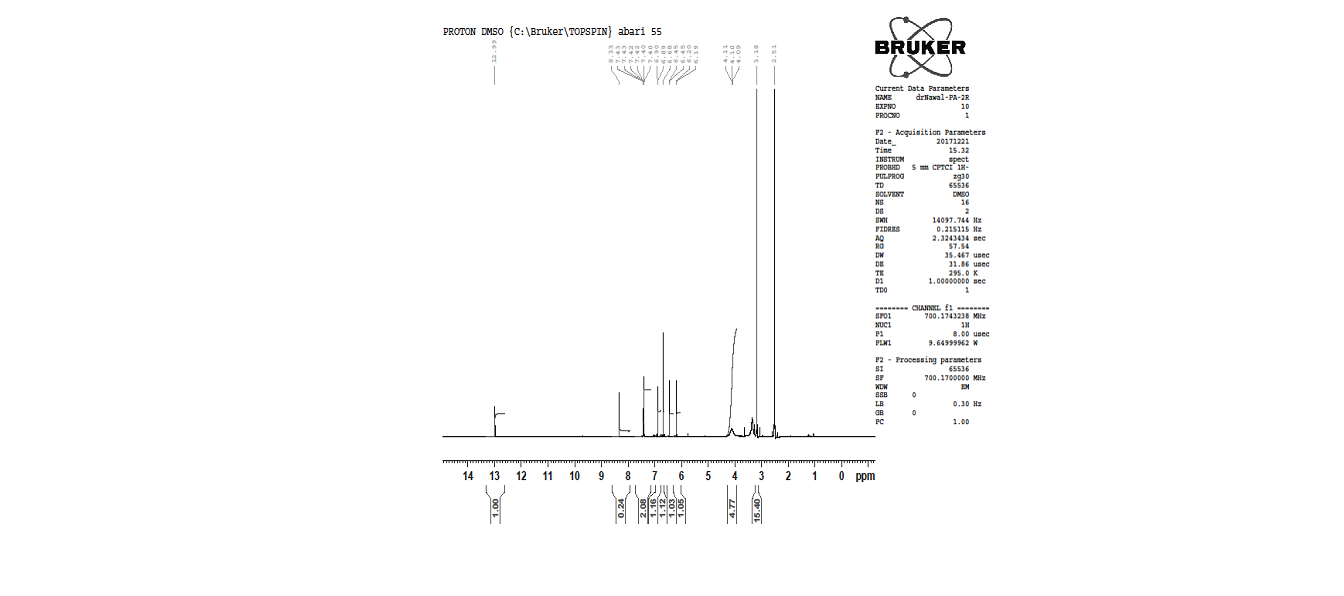


**Figure S7:** 1H NMR expansion spectrum of compound **2** (700 MHz, DMSO).


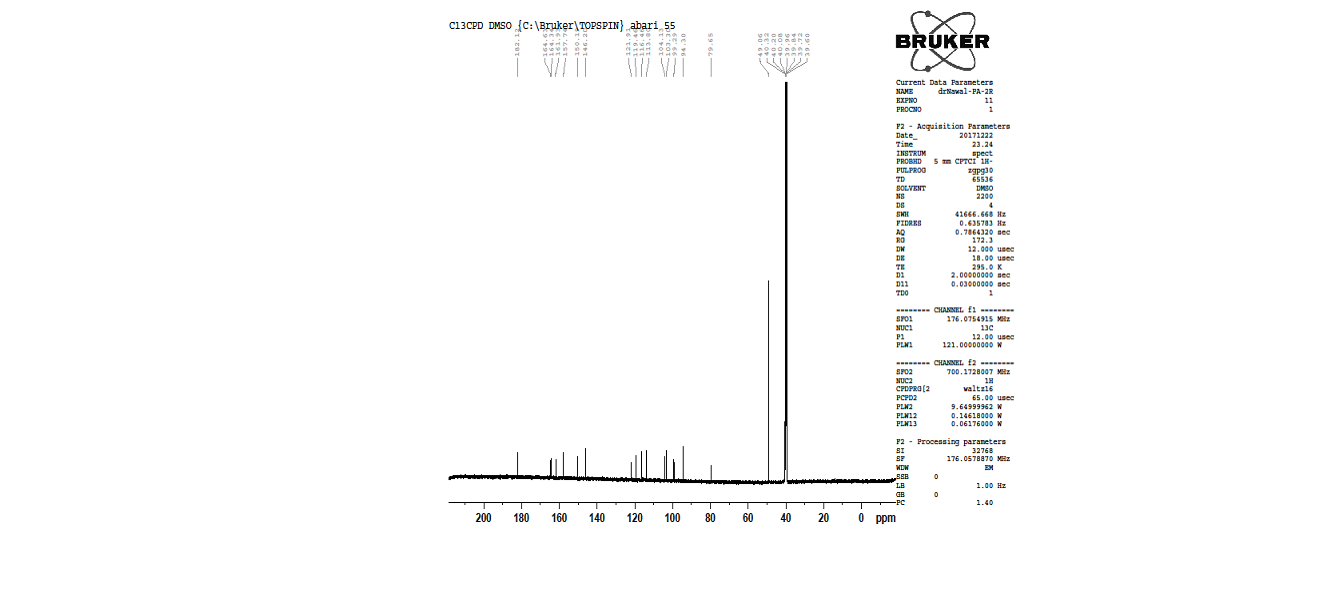


**Figure S8:**13C NMR spectrum of compound **2** (175 MHz, DMSO).


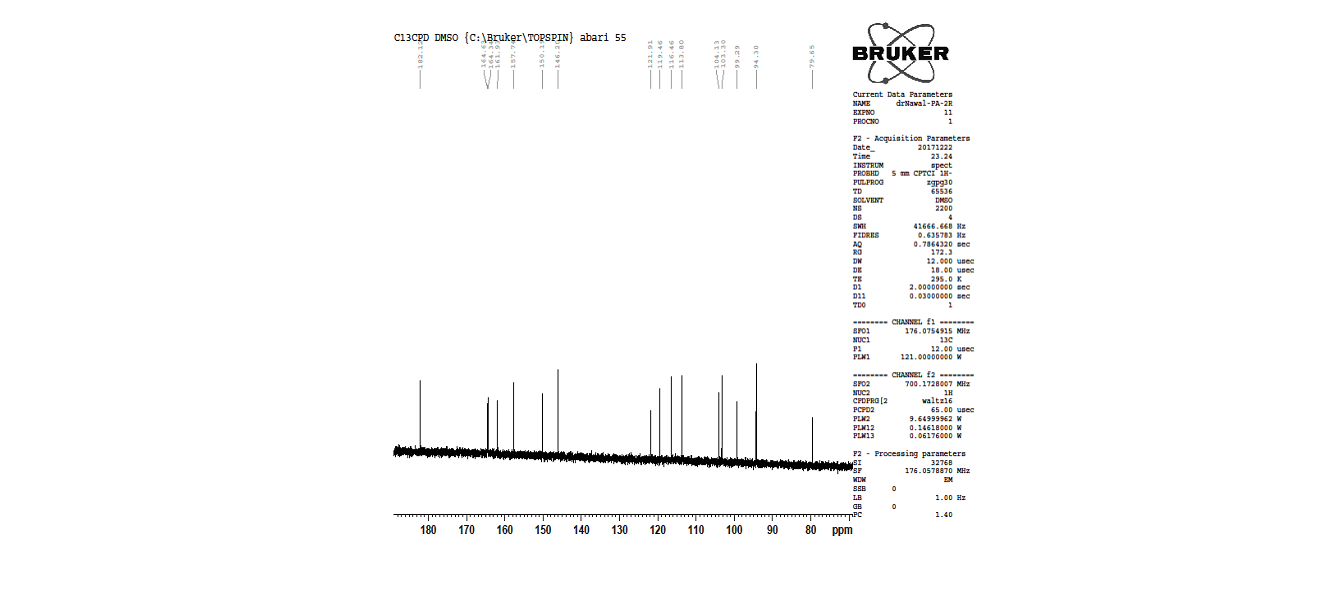


**Figure S9:** 13C NMR expansion spectrum of compound **2** (175 MHz, DMSO)
